# Supplementary material for: Effects of balneotherapy and spa therapy on quality of life of patients with knee osteoarthritis: a systematic review and meta-analysis
Source: Springer Nature journal article supplement (doi:10.1007/s00296-018-4081-6), 2018-06-12
Supplement: MOESM2 [file 15839176]

**Supplementary Material B (Figure)**: Funnel plot with trials included in the first meta-analysis (see Figure 2).


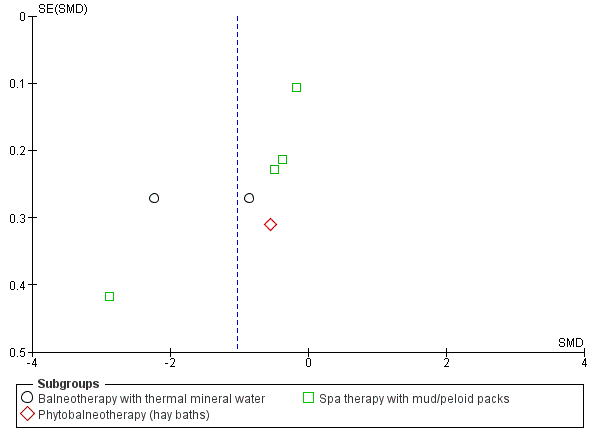


**Caption**: Trials are represented by colored marks depending on the type of intervention.

**Keys**: SE: Size Effect; SMD: Standardized Mean Difference.
